# AEGIS: An In Silico Tool to model Genome Evolution in Age-Structured Populations

William J. Bradshaw<sup>1,2,\*</sup>, Arian Šajina<sup>1,\*</sup>, and Dario Riccardo Valenzano<sup>1,2,a</sup>

<sup>1</sup> Max Planck Institute for Biology of Ageing, Cologne, Germany

<sup>2</sup> CECAD, University of Cologne, Cologne, Germany

\* These authors contributed equally to this paper.

<sup>a</sup> Corresponding author: [dvalenzano@age.mpg.de](mailto:dvalenzano@age.mpg.de)

**Keywords:** Ageing, lifespan, fitness, life-history, evolution, simulations

## Abstract

AEGIS (Ageing of Evolving Genomes In Silico) is a versatile population-genetics numerical-simulation tool that enables the evolution of life history trajectories under sexual and asexual reproduction and a wide variety of evolutionary constraints. By encoding age-specific survival and reproduction probabilities as discrete genomic elements, AEGIS allows these probabilities to evolve freely and independently over time. Simulation of population evolution with AEGIS demonstrates that ageing-like phenotypes evolve in stable environments under a wide range of conditions, that life history trajectories depend heavily on mutation rates, and that sexual populations are better able to accumulate high levels of beneficial mutations affecting early-life survival and reproduction. AEGIS is free and open-source, and aims to become a standard reference tool in the study of life-history evolution and the evolutionary biology of ageing.

## Introduction

Species in nature vastly differ in life histories, with dramatic variation in maturation rate, lifespan, and fecundity. In general, age-dependent mortality increases as a function of age while age-dependent fecundity declines, a phenomenon known as *ageing* or *senescence*. However, in some organisms mortality decreases or remains constant through life, while fecundity remains constant or increases (Jones et al., 2014). These difference in demography can have important effects on fitness, giving rise to dramatic differences in lifetime reproductive output between species.

The evolution of age-dependent changes in mortality and reproduction has been an important object of theoretical investigation since the dawn of population genetics, giving rise to a number of theories to explain the widespread occurrence of senescence in nature. Work from Haldane, Medawar, Hamilton and others predicts that the declining force of natural selection after reproductive maturation should inevitably lead to the accumulation of deleterious gene variants, resulting in increased mortality later in life (Haldane, 1941; Medawar, 1952; Hamilton, 1966; Charlesworth, 2000). While these mutation-accumulation theories of ageing explain ageing as a fundamentally non-adaptive process, other evolutionary theories of ageing suggest senescence could evolve

33 as an antagonistic side-effect of positively-selected traits (Williams, 1957), or even as a kin- or group-selected  
34 adaptation in its own right (Longo et al., 2005; Lohr et al., 2019).

35 Up to now, the evolution of life-history traits, including age-dependent changes in survival and reproduc-  
36 tion, has primarily been performed using analytical approaches (Hamilton, 1966; Charlesworth, 1994; Fisher,  
37 1930); while some simple numerical models exploring the evolution of ageing have been proposed (Penna,  
38 1995; Dzwiniel et al., 2005; Werfel et al., 2015), there remains a need for a flexible simulation tool to model the  
39 evolution of ageing. In particular, a model which permits independent evolution in both mortality and fecundity  
40 at different ages could capture a wider range of possible life histories and so provide a particularly powerful  
41 tool for simulating the evolution of ageing.

42 Here, we present and release AEGIS (Ageing of Evolving Genomes *In Silico*), a ready-to-use numerical  
43 model of genome evolution that simulates how age-dependent changes in survival and reproduction evolve  
44 under a range of different ecological and demographic scenarios.

## 45 New Approaches

46 AEGIS is a Python-based platform implementing and extending a discrete-time, non-spatial numerical model  
47 of genome evolution (Šajina et al., 2016). In this model, each individual is represented by a diploid bit-string  
48 genome, which is divided into age-specific survival and reproduction loci specifying the baseline survival and  
49 reproduction probabilities of that individual at the appropriate age (Fig. 1A), where “age” designates the number  
50 of discrete-time stages since the individual was added to the population. These probabilities scale linearly  
51 between user-specified bounds ( $p_{\min}$ ,  $p_{\max}$ ) based on the additive sum  $L$  of the bit values in the appropriate loci  
52 across both chromosomes:

$$P(\text{survival at age } i) = p_{\min}^{\text{surv}} + \frac{p_{\max}^{\text{surv}} - p_{\min}^{\text{surv}}}{2 \cdot h} \cdot L_i^{\text{surv}} \quad (1)$$

$$P(\text{reproduction at age } i) = p_{\min}^{\text{repr}} + \frac{p_{\max}^{\text{repr}} - p_{\min}^{\text{repr}}}{2 \cdot h} \cdot L_i^{\text{repr}} \quad (2)$$

53 where  $h$  is the number of bits per locus per chromosome. The survival and reproduction probabilities are  
54 therefore lowest when all bits in the corresponding loci are equal to 0, and highest when they are all equal to 1.  
55 In addition to survival and reproduction loci, the genome also contains some number of neutral loci without a  
56 phenotypic effect, which serve to track the effects of neutral evolution on genome composition.

57 Upon initialisation, the population consists of some number of new individuals with uniformly-distributed  
58 genome composition and age values. The population is then permitted to evolve freely in discrete time, with  
59 individuals reproducing and dying at each stage according to the probabilities specified by their genomes  
60 (Fig. 1B). In asexual reproduction, each parent individual gives rise to one offspring per stage in which it  
61 reproduces, whose genome is first copied from the parent and then mutated. The rates of positive ( $0 \rightarrow 1$ )  
62 and negative ( $1 \rightarrow 0$ ) mutations are specified separately; since mutations with a negative effect on fitness are  
63 much more common in real-world systems, the former probability is typically lower than the latter. In sex-  
64 ual populations, parent individuals are grouped randomly into pairs, the chromosomes of each parent undergo  
65 recombination with each other (Supplementary Material), and one chromosome is selected from each parent  
66 (assortment) to produce the child genome, which is mutated as above. In both cases, the allele composition of  
67 the new generation is drawn from that of the previous generation, and successive generations overlap within the  
68 population.

69 To limit the size of the population and impose competition between individuals, a resource limit is imposed

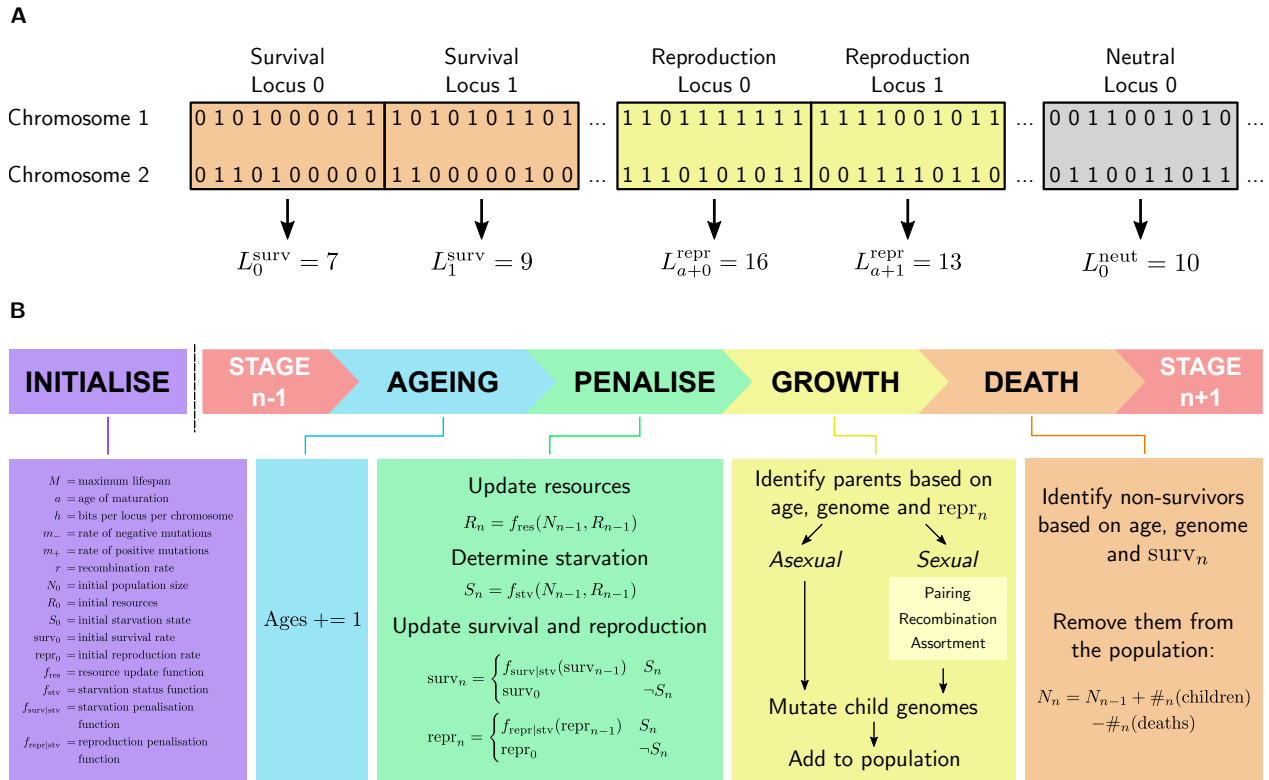

Figure 1: AEGIS workflow. (A) Each individual in an AEGIS population has a diploid bit-string genome comprising survival, reproduction and neutral loci. The sum  $L$  of bits across both chromosomes at a given locus position determines the probability of survival or reproduction at the appropriate age.  $a$  denotes the age of reproductive maturation for the population. (B) At each stage  $n$  of an AEGIS simulation, individuals increment their ages, then reproduce and die based on their ages, genomes and the starvation status of the population.

70 on the population. By default, an initial resource level is set which remains constant throughout the simulation;  
 71 if the size of the population exceeds this threshold, the survival probability of each individual is subjected to  
 72 a compounding starvation penalty until the population falls below the resource limit. This typically leads to a  
 73 rapid fluctuation of population size around the set value (Fig. 2A), as populations sequentially overshoot the  
 74 resource limit and die back to a smaller size (Fig. 2B).

75 One particularly important aspect of the model of evolution implemented by AEGIS is the manner in which  
 76 it enables explicit calculation and comparison of fitness values. Because the baseline survival and reproduction  
 77 probabilities of each individual are directly specified by its genome, the fitness of any individual (defined as  
 78 its expected lifetime reproductive output) can be directly computed for any given set of probability bounds and  
 79 starvation regime:

$$\text{Fitness} = v \cdot \sum_{i=0}^M \left[ \text{P}(\text{reproduction at age } i) \prod_{j=0}^i \text{P}(\text{survival at age } j) \right] \quad (3)$$

80 where  $M$  is the maximum lifespan of the population and  $v$  (equal to 1 for asexual populations and 0.5 for sexual  
 81 ones) denotes the relative genetic contribution of a parent to its offspring. In the case of so-called *genotypic*  
 82 *fitness*, this value is calculated directly using the baseline survival and reproduction probabilities specified by  
 83 the individual's genotype sums and user-specified probability bounds, without any starvation penalties. The  
 84 distribution of individual and mean population fitness values can then be compared between populations to  
 85 investigate the evolution of fitness in response to different conditions.

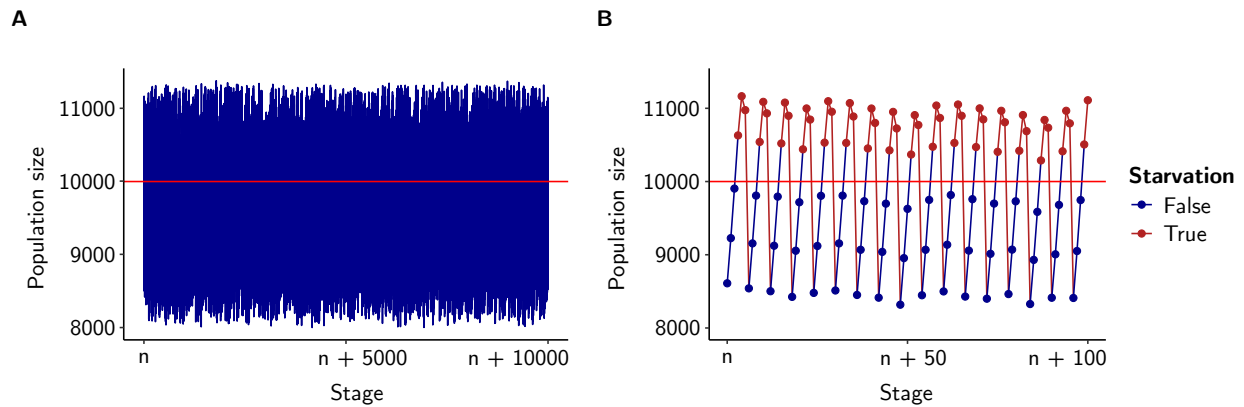

Figure 2: Population fluctuations in AEGIS simulations. (A) Trace of population size during 10,000 stages of an AEGIS run under sexual reproduction, showing cyclical fluctuations around a set resource level (horizontal red line), above which the population enters starvation. (B) Close-up trace of 100 stages from the same run, showing repeated cycles of population growth, starvation, and collapse.

86 The runtime of an AEGIS simulation depends primarily on the number of stages, the population size (as  
87 determined by the resource limit), the genome size, and whether reproduction is sexual or asexual. Sexual re-  
88 production is more computationally demanding, primarily due to the complexity of the recombination process.  
89 For example, a 256-GB-RAM machine with 8 CPUs per task was able to complete a one-million-stage simu-  
90 lation with the default genome size and asexual reproduction in 2 h 40 min when the resource limit was 1000  
91 and 2 d 17 h 31 min when the resource limit was 20000; with sexual reproduction, the runtimes were roughly  
92 double this.

93 Following run completion, AEGIS can save a wide range of data in a cross-compatible CSV format. Some  
94 simple metrics, such as population size, are recorded at every stage of the run, while more complex information  
95 (such as genotype-frequency distributions) is recorded for a pre-specified number of “snapshot” stages evenly  
96 distributed throughout the run. The data output by AEGIS can be used for a wide variety of downstream  
97 analysis and visualisation purposes.

98 A detailed tutorial for AEGIS installation and use is provided along with example configuration files at  
99 [github.com/valenzano-lab/aegis](https://github.com/valenzano-lab/aegis).

## 100 **Ageing evolves differently in sexual and asexual populations**

101 One of the most fundamental applications of the AEGIS simulation tool is in investigating the evolution of  
102 age-dependent survival and reproduction across different conditions. Starting from an initial genome contain-  
103 ing uniformly-distributed 0's and 1's, we find that ageing-like phenotypes reliably evolve across a wide range  
104 of population sizes, mutation rates and reproductive strategies (Fig. 3A to 3C). When mutation rates are suf-  
105 ficiently low, loci determining survival and reproduction in early life accumulate large numbers of beneficial  
106 mutations, resulting in low baseline (i.e. non-starvation) mortality rates before and immediately after repro-  
107 ductive maturation and high fecundity levels in early adulthood. Following reproductive maturation, survival  
108 and reproduction rates progressively decline as the genotype sums of the corresponding loci accumulate pro-  
109 gressively larger numbers of deleterious mutations. Remarkably, the genotype sums of loci affecting older age  
110 groups consistently converge on the mean genotype value of the neutral loci in the genome, indicating that  
111 selection is relaxed towards neutrality in genes affecting late-life.

112 While ageing-like phenotypes consistently evolved across a wide range of initial conditions, the specific

113 outcome of the simulation depended heavily on the mutation rate and reproductive strategy imposed on the  
114 population (Fig. 3C). At very low mutation rates, pre-reproductive-maturation survival rates evolve to near-  
115 maximal levels, and very high baseline survival and reproduction probabilities often persist for extended periods  
116 following maturation. As mutation levels increase, the pre-maturation survival rates and the post-maturation de-  
117 cline in survival and reproduction shift to progressively earlier ages. At very high mutation rates, the increased  
118 survival and reproduction of early ages is completely abrogated, and the entire genome behaves similarly to  
119 the neutral loci. Hence, as the mutation rate increases, the level of selection required to maintain a favourable  
120 genotype increases, resulting in a shift towards more rapid ageing and shorter expected lifespans.

121 In addition to the effect of mutation rates, the choice between sexual and asexual reproduction has dramatic  
122 effects on the evolution of ageing in the AEGIS model. Under the rates of mutation and recombination used  
123 in Fig. 3, asexual populations consistently exhibit lower pre-maturation survival rates and more rapid post-  
124 maturation declines in survival and reproduction rates than sexual populations (Fig. 3C). As a result, survival  
125 and reproduction rates in sexual populations typically exceed those of asexual populations evolving under  
126 similar conditions, and the transition from a condition of elevated early-life fitness to one in which the entire  
127 genome appears to evolve neutrally occurs at lower mutation rates when reproduction is asexual.

128 As a result of these differences in life history evolution, the average genotypic fitness of individuals in  
129 sexual populations consistently evolves to a higher level than in asexual populations, with the size of the gap  
130 increasing as the mutation rate declines (Fig. 3D); only at very high mutation rates, at which both reproductive  
131 strategies give rise to near-neutral reproduction and survival phenotypes at most loci, do the fitnesses of sexual  
132 and asexual populations converge. Investigating genotypic fitness at different points in time under intermediate  
133 mutation rates (Fig. 3E) reveals the kinetics of this divergence: although both sexual and asexual populations  
134 begin at the same average genotypic fitness, in sexual populations the genotypic fitness progressively increases  
135 to a high equilibrium value, while in asexual populations a small initial increase is followed by progressive  
136 decay, in a manner compatible with the accumulation of irreversible mutations predicted by Muller's ratchet  
137 (Muller, 1964; Felsenstein, 1974).

138 Why would sexual and asexual populations evolve such different life histories under shared environmental,  
139 genetic and phenotypic constraints? One plausible explanation is the Hill-Robertson effect (Hill et al., 1966),  
140 whereby recombination and assortment enable beneficial mutations occurring in different lineages to accumu-  
141 late on the same chromosome. In contrast, each asexual individual is restricted to mutations occurring within its  
142 single line of ancestors, and improvements to population fitness can only occur through competition between  
143 autarkic asexual lineages. As a result, sexual populations are able to accumulate larger numbers of beneficial  
144 mutations in loci affecting early-life survival and reproduction relatively rapidly, and can sustain higher rates  
145 of survival and reproduction in the face of a given rate of negative mutations. Under this explanation, the  
146 differences between life histories evolved by sexual and asexual populations are therefore driven primarily by  
147 differences in positive, rather than purifying, selection.

## 148 Discussion

149 The evolutionary mechanisms underlying the widespread occurrence of senescence across taxa have long been a  
150 topic of interest among evolutionary biologists, population geneticists, and biogerontologists. Genomic surveys  
151 in unusually long- or short-lived species have attempted to identify the genetic changes underlying differences  
152 in life histories across species, typically by identifying genes exhibiting significant sequence changes in partic-  
153 ular taxa (Keane et al., 2015; Kim et al., 2011; Seim et al., 2013; Valenzano et al., 2015) potentially associated  
154 with positive selection. While experimental work of this kind has identified specific genes and conserved

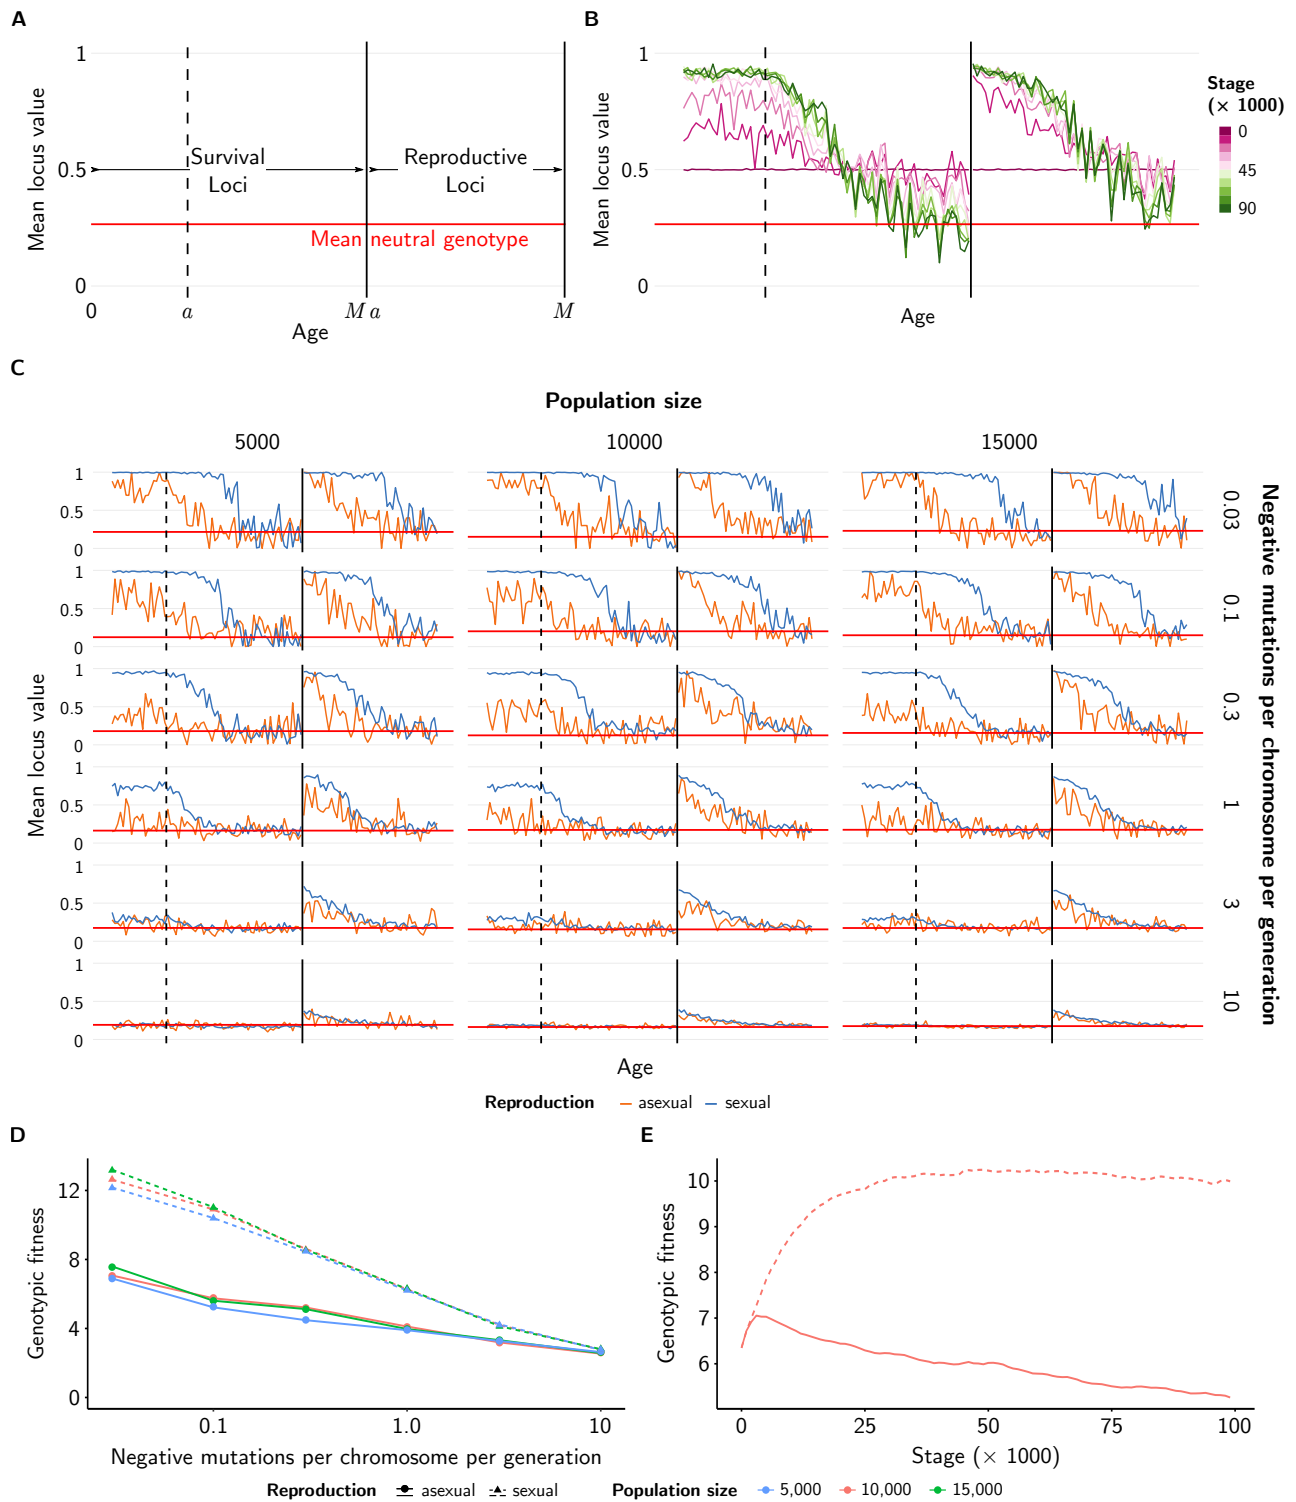

Figure 3: Life-history evolution in the AEGIS model. (A) Explanation of genotype plots in subsequent panels. Loci coding for survival from age 0 to maximum lifespan,  $M$ , are plotted in order on the left, while loci coding for reproduction probabilities from reproductive maturation,  $a$ , to maximum lifespan are shown on the right of the solid vertical line. The dashed vertical line indicates the transition from pre-maturation to post-maturation survival loci. The red horizontal line shows the mean value of neutral loci across all populations shown on a given pair of axes. (B) Genotype plot of a sexual population under a negative mutation rate of 0.3 per chromosome per generation and a resource level of 10,000, showing the progressive evolution of an ageing phenotype over 100,000 stages. (C) Grid of genotype plots showing the state of sexual and asexual populations under a variety of resource and mutation conditions after 1 million stages. (D) Plot of average genotypic fitness values for the same populations after 1 million stages, showing the decline in genotypic fitness with increasing mutation rate. (E) Plot of average genotypic fitness of a sexual and an asexual population under a negative mutation rate of 0.3 and a resource level of 10,000, over the first 100,000 stages of a simulation. In all subfigures,  $a = 21$ ,  $M = 70$ , and the rate of positive mutations is equal to 20% of the rate of negative mutations.

155 molecular pathways impacting ageing and lifespan in particular species (Tacutu et al., 2017), little is known  
156 about how differences in life history evolve between natural populations. To date, except for a few simple  
157 models (Stauffer, 2007), there has been a general lack of numerical tools for simulating the evolution of life  
158 histories, impeding the investigation of how ageing and lifespan evolve under different selective conditions.

159 AEGIS is intended to fill this gap, providing a versatile and accessible numerical tool to simulate the  
160 evolution of lifespan and ageing under a wide range of genetic, selective and demographic constraints. The  
161 AEGIS software is simple to install and use, can run on both personal computers (for simple runs) and high-  
162 performance clusters (for large, intensive runs) and provides ready-to-use graphical visualisations and cross-  
163 platform output for downstream investigations. Since survival and reproduction probabilities are explicitly  
164 encoded in the genomes of AEGIS populations, the model allows accurate calculation of individual and mean  
165 population fitness, enabling the investigation of time-dependent changes in allele frequency under different  
166 selective constraints.

167 While AEGIS exceeds previous models in its flexibility and power, there are nevertheless a number of  
168 important extensions and improvements that could be made. The current AEGIS model contains no scope  
169 for inter-population competition, freely-evolving mutation rates, or the multi-age-affecting loci that would be  
170 needed to test theories of ageing relying on epistatic or pleiotropic effects. Future work on the model, both by  
171 the current authors and other contributors to the open-source AEGIS project, will fill these gaps and further  
172 improve our ability to use numerical simulation to interrogate the evolution of ageing.

## 173 **Acknowledgements**

174 We are thankful to all the members of the Valenzano lab at the Max Planck Institute for Biology of Ageing for  
175 continuous feedback on this project and to Jorge Boucas and all the members of the MPI-Age bioinformatic  
176 core facility and IT for allowing continuous usage of the MPI-Age computing cluster. We would like to thank  
177 Fabio Iocco for discussions and intellectual contribution to the early stages of development of this project.  
178 This work has been entirely supported by the Max Planck Society and the Max Planck Institute for Biology of  
179 Ageing in Cologne, Germany.

## 180 **References**

- 181 Jones, O. R. et al. (2014). Diversity of ageing across the tree of life. *Nature* 505 (7482): 169–173.
- 182 Haldane, J. B. S. (1941). *New paths in genetics*. London: George Allen & Unwin.
- 183 Medawar, P. B. (1952). *An unsolved problem of biology*. London: HK Lewis & Co.
- 184 Hamilton, W. D. (1966). The moulding of senescence by natural selection. *Journal of Theoretical Biology*  
185 12 (1): 12–45.
- 186 Charlesworth, B. (2000). Fisher, Medawar, Hamilton and the evolution of aging. *Genetics* 156 (3): 927–931.
- 187 Williams, G. C. (1957). Pleiotropy, natural selection, and the evolution of senescence. *Evolution* 11 (4): 398–  
188 411.
- 189 Longo, V. D., J. Mitteldorf, and V. P. Skulachev (2005). Programmed and altruistic ageing. *Nature Reviews*  
190 *Genetics* 6 (11): 866–872.
- 191 Lohr, J. N., E. R. Galimov, and D. Gems (2019). Does senescence promote fitness in *Caenorhabditis elegans*  
192 by causing death? *Ageing Research Reviews* 50: 58–71.
- 193 Charlesworth, B. (1994). *Evolution in age-structured populations*. Cambridge: Cambridge University Press.
- 194 Fisher, R. A. (1930). *The genetical theory of natural selection*. Oxford: Oxford University Press.

- 195 Penna, T. J. P. (1995). A bit-string model for biological aging. *Journal of Statistical Physics* 78 (5): 1629–1633.
- 196 Dzwiniel, W. and D. A. Yuen (2005). Aging in Hostile Environment Modeled by Cellular Automata with Genetic  
197 Dynamics. *International Journal of Modern Physics C* 16 (3): 357–376.
- 198 Werfel, J., D. E. Ingber, and Y. Bar-Yam (2015). Programed death is favored by natural selection in spatial  
199 systems. *Physical Review Letters* 114 (23): 238103.
- 200 Šajina, A. and D. R. Valenzano (2016). An *In Silico* Model to Simulate the Evolution of Biological Aging.  
201 *arXiv*: 1602.00723.
- 202 Muller, H. (1964). The relation of recombination to mutational advance. *Mutation Research* 106: 2–9.
- 203 Felsenstein, J. (1974). The evolutionary advantage of recombination. *Genetics* 78 (2): 737–756.
- 204 Hill, W. G. and A. Robertson (1966). The effect of linkage on limits to artificial selection. *Genetics Research*  
205 8 (3): 269–294.
- 206 Keane, M. et al. (2015). Insights into the evolution of longevity from the bowhead whale genome. *Cell Reports*  
207 10 (1): 112–122.
- 208 Kim, E. B. et al. (2011). Genome sequencing reveals insights into physiology and longevity of the naked mole  
209 rat. *Nature* 479 (7372): 223–227.
- 210 Seim, I. et al. (2013). Genome analysis reveals insights into physiology and longevity of the Brandt’s bat *Myotis*  
211 *brandtii*. *Nature Communications* 4: 2212.
- 212 Valenzano, D. R. et al. (2015). The African turquoise killifish genome provides insights into evolution and  
213 genetic architecture of lifespan. *Cell* 163 (6): 1539–1554.
- 214 Tacutu, R. et al. (2017). Human Ageing Genomic Resources: new and updated databases. *Nucleic Acids Re-*  
215 *search* 46 (D1): D1083–D1090.
- 216 Stauffer, D. (2007). The Penna Model of Biological Aging. *Bioinformatics and Biology Insights* 1: 91–100.



## 217 **Supplementary Material**

### 218 **The AEGIS run**

#### 219 **Initialisation**

220 Every AEGIS simulation is initialised from a configuration file, which specifies the population and run param-  
221 eters for that simulation (the config file for Fig. 3B, for example, is shown in Fig. S1). Upon run initialisation,  
222 the parameters in the config file are used to derive a range of other parameters, such as the survival and re-  
223 production probabilities corresponding to each possible genotype, the number of loci, and the length of each  
224 chromosome in bits. The per-bit probability  $m_+$  of positive mutations is determined based on the user-specified  
225 probability  $m_-$  of negative mutations and the specified positive:negative mutation ratio  $v$ :

$$m_+ = v \times m_- \quad (\text{S1})$$

226 A single genome layout is defined for all individuals, and is randomised at the start of the simulation to  
227 minimise the impact of interlocus linkage effects. Finally, the starting population of individuals is initialised:  
228 by default, the starting genomes of the population are drawn from a discrete uniform distribution with sample  
229 space  $\{0, 1\}$ , while the starting age of each individual is sampled randomly from the set  $\{0, 1, \dots, M\}$ , where  $M$   
230 is the maximum lifespan.

231 In the case of the simulations presented in Fig. 2 and 3, the user-defined bounds on survival and reproduction  
232 probability (from which age-dependent probabilities are derived via Equations 1 and 2) were defined such that  
233 firstly, the population does not regularly go extinct over the course of the simulation, and secondly, almost all  
234 individuals die out before reaching maximum lifespan.

#### 235 **Stage progression**

236 Following initialisation, the run progresses in discrete time stages. At the start of each stage, the age of each  
237 individual increments by 1. The available resources are then updated, and the starvation state of the population  
238 is determined based on the population size and the available resource level: by default, resources are constant  
239 and the population enters starvation if the population size exceeds the set resource level. If starvation occurs,  
240 the survival and reproduction probabilities corresponding to each genotype sum value are penalised based on  
241 the number of turns the population has been in starvation; by default the probability of death trebles each turn  
242 during starvation, while reproduction probability remains constant. The imposition of a starvation penalty in  
243 this manner limits the size of the population, and thus ensures the simulation remains practically computable,  
244 while also imposing competition for resources between individuals.

245 Following resource updating, the population enters the reproduction phase. For each individual, the prob-  
246 ability of parental status is determined based on its age, the genotype sum of the reproduction locus corre-  
247 sponding to that age, and the user-specified probability bounds (Equation 2). Each parent is then randomly  
248 and independently classified as a parent or non-parent based on this probability. In asexual populations, the  
249 population of parents is then duplicated to generate a population of children, each of which is assigned an age  
250 of 0. The genome of each child is then mutated according to the probabilities of positive and negative mutations  
251 determined during initialisation: each 0-bit is independently mutated to a 1-bit with probability  $m_+$ , and each  
252 1-bit is independently mutated to a 0-bit with probability  $m_-$ . Finally, the population of children is then added  
253 to the overall population.

254 In sexual populations, the population of parents is grouped into mating pairs at random; in the event of an  
255 odd number of parents, one parent is selected at random and does not reproduce. The two chromosomes of

```
#####
## AEGIS v.2.1 CONFIGURATION FILE ##
#####

## CORE PARAMETERS ##
random_seed = "" # If numeric, sets random seed to that value before execution
n_runs = 1 # Total number of independent runs
n_stages = 10000 # Total number of stages per run [int/"auto"]
n_snapshots = 101 # Points in run at which to record detailed data
path_to_seed_file = "" # Path to simulation seed file, if no seed then ""
    # see README for which parameters are inherited from seed, which are
    # defined anew in this config file
max_fail = 10 # Maximum number of failed attempts tolerated for each run

## OUTPUT SPECIFICATIONS ##
output_prefix = 'sex-p_10000-m_0.3-snaps-r_init'
output_mode = 0 # 0 = return records only, 1 = return records + final pop,
    # 2 = return records + all snapshot populations
age_dist_N = "all" # Window size around snapshots stage/generation for no_auto/auto
    # for which to record age distribution [int/"all"]
    # "all" saves age distribution at all stages

## STARTING PARAMETERS ##
repr_mode = 'sexual'
res_start = 10000
start_pop = res_start # Starting population size

## RESOURCE PARAMETERS ##
res_function = lambda n,r: r # Function for updating resources; here constant
stv_function = lambda n,r: n > r # Function for identifying starvation
kill_at = 0 # stage/generation for no_auto/auto respectively at which to force
    # dieoff, 0 if none

## PENALISATION ##
pen_cum1 = True # Is the penalty cumulative? If True the function compounds,
    # otherwise it is always applied on the default value
surv_pen_func = lambda s_range,n,r: 1-(1-s_range)*3
repr_pen_func = lambda r_range,n,r: r_range

## AUTOCOMPUTING GENERATION NUMBER ##
deltabar = 0.01 # Relative error allowed for the deviation from the stationary
    # distribution
scale = 1.01 # Scaling factor applied to target generation estimated for deltabar
max_stages = 500000 # Maximum number of stages to run before terminating

## SIMULATION FUNDAMENTALS: CHANGE WITH CARE ##
surv_bound = [0.98, 0.99] # min and max death rates
repr_bound = [0,1]

n_neutral = 5 # Number of neutral loci in genome
n_base = 5 # Number of bits per locus
max_ls = 70 # Maximum lifespan (must be > repr_offset) (-1 = infinite)
maturity = 21 # Age from which an individual can reproduce (must be <= max_ls)

r_rate = 1.0 / ((2*max_ls-maturity+n_neutral)*n_base) # Recombination rate (if sexual)
m_rate = 0.3 / ((2*max_ls-maturity+n_neutral)*n_base) # Rate of negative mutations
m_ratio = 0.2 # Ratio of positive to negative mutations

g_dist = {"s": 0.5, # Proportion of 1's in survival loci of initial genomes
    "r": 0.5, # reproductive loci
    "n": 0.5} # neutral loci
repr_offset = 100 # Offset for repr loci in genome map (must be <= max_ls)
neut_offset = 200 # Offset for neut loci (<= repr_offset + max_ls - maturity)

# Size of sliding windows for recording averaged statistics:
windows = {"population_size": 1000, "resources":1000, "n1":n_base}
```

Figure S1: An example AEGIS config file.

256 each parent undergo recombination (see below), shuffling corresponding genome segments between the two  
257 chromosomes. After recombination, one chromosome is selected at random from each parent, and the two  
258 chromosomes are concatenated in a random order to generate a new child individual (assortment). Each child  
259 produced in this way is assigned age 0, and the genome of the child population is mutated as in the asexual case  
260 before being added to the overall population.

261 Following reproduction, the final phase of each stage is death of individuals. As in reproduction, the  
262 survival probability of each individual is determined based on its age, the genotype sum of the corresponding  
263 locus, and the user-specified probability bounds (Equation 1), and each individual is independently classified  
264 as surviving or dying based on these probabilities. The population of survivors is retained for the next stage of  
265 the simulation, while the remaining individuals are discarded.

266 The complete code of the AEGIS simulation software, including the functions for all the above operations,  
267 is available at [github.com/valenzano-lab/aegis](https://github.com/valenzano-lab/aegis).

## 268 **Recombination**

269 Conceptually, recombination involves aligning the homologous chromosomes of an individual and randomly  
270 exchanging corresponding portions of sequence between each chromosome pair. Computationally, this process  
271 can be simulated by randomly determining recombination sites along the length of the chromosome (with  
272 some independent probability  $r$  for each position to be selected as a recombination site) and exchanging the  
273 corresponding sequence on each chromosome between each site and the end of the chromosome (Fig. S2A).  
274 However, rather than actually performing a large number of exchange operations, it is computationally far  
275 more efficient to simply count the number of recombinations affecting each position along the chromosome  
276 and exchange only those portions affected by an odd number of recombination events (Fig. S2B).

277 In order to avoid a directional bias in recombination (in which, for example, positions at the end of the  
278 chromosome are much more likely to be transferred between chromosomes than positions at the beginning),  
279 it is also important to randomly determine the orientation of each recombination event, such that some events  
280 affect sequence between the recombination site and the end of the chromosome and others affect sequence  
281 between the start of the chromosome and the recombination site (Fig. S2C).

282 In AEGIS, therefore, recombination in sexual populations is implemented as two independent processes,  
283 one producing forward-oriented recombination events and the other reverse-oriented ones. At the beginning  
284 of the recombination process, forward and reverse recombination sites are determined randomly, with each  
285 site having an independent  $\frac{r}{2}$  probability of being selected as a forward site and the same probability of being  
286 selected as a reverse site. Each event affects all chromosome positions between the recombination site and the  
287 appropriate end of the chromosome, inclusive of the recombination site. The number of recombination events  
288 affecting each chromosomal position is then quantified, and regions of sequence affected by an odd number of  
289 events are exchanged between the two chromosomes (Fig. S2B and S2C).

290 At present, interference between recombination sites is not implemented in AEGIS. Modification of the  
291 recombination algorithm to permit different interference functions could be implemented in a future extension  
292 of the software.

## 293 **Analytic behaviour of the neutral loci**

294 A locus in the AEGIS genome without a phenotypic (i.e. reproduction or survival) effect is referred to as  
295 *neutral*. As these loci are not affected by selection on survival or reproduction rates, their evolution over time is  
296 relatively easy to model analytically, especially in the asexual case, and provides some useful predictions about

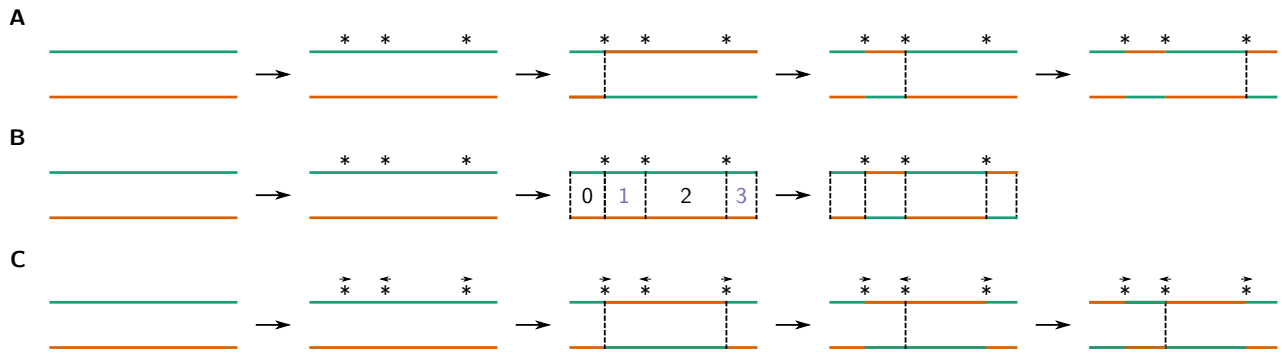

Figure S2: Recombination in the AEGIS model. (A) In a naïve implementation of chromosomal recombination, recombination sites are determined at random and corresponding chromosomal sequences are exchanged at each site in turn. (B) In a more efficient implementation, the number of recombination events affecting each chromosomal position is counted, and regions affected by an odd number of events are exchanged. (C) In order to avoid directional bias in the probability of a given chromosomal position being exchanged between chromosomes, forward- and reverse-oriented recombination events must occur with equal probability.

297 the behaviour of the model over time.

298 Unlike with survival and reproduction loci, the *sum* over the bits in a neutral locus has no phenotypic  
 299 effect; as a result, in the absence of linkage, the evolution of each bit in the locus can be assumed to evolve  
 300 independently.

301 Let  $\mu$  denote the rate of negative ( $1 \rightarrow 0$ ) mutations and  $\nu$  the ratio of positive to negative mutations.  
 302 The rate of positive ( $0 \rightarrow 1$ ) mutations is then given by  $\mu \cdot \nu$ . These transition probabilities are memoryless:  
 303 conditional on the state of the bit, the probability of a transition is independent of its past states. The evolution  
 304 of each bit in the neutral locus can therefore be modelled as a two-state discrete-time Markov chain, with  
 305 transition matrix

$$A = \begin{bmatrix} 1 - \beta & \beta \\ \alpha & 1 - \alpha \end{bmatrix} \quad (\text{S2})$$

306 where  $\alpha = \mu$ ,  $\beta = \mu \nu$ , the first row and column indicate state 0 and the second row and column indicate state  
 307 1. At generation  $k$ , the state distribution of the Markov chain is therefore given by

$$\varphi_k = \varphi_0 \cdot A^k = \varphi_0 \cdot \left( \frac{1}{\alpha + \beta} \begin{bmatrix} \alpha & \beta \\ \alpha & \beta \end{bmatrix} + \frac{(1 - \alpha - \beta)^k}{\alpha + \beta} \begin{bmatrix} \beta & -\beta \\ -\alpha & \alpha \end{bmatrix} \right) \quad (\text{S3})$$

308 After many generations of mutation, the second term within the parentheses tends towards zero, and the Markov  
 309 chain approaches its limiting distribution:

$$\zeta = \left[ \frac{\alpha}{\alpha + \beta}, \frac{\beta}{\alpha + \beta} \right] \quad (\text{S4})$$

310 As a result, the expected value of the bits in a neutral locus converges over time to

$$\mathcal{N} = E(\text{bit value}) = 0 \cdot \frac{\alpha}{\alpha + \beta} + 1 \cdot \frac{\beta}{\alpha + \beta} = \frac{\beta}{\alpha + \beta} = \frac{\mu \nu}{\mu + \mu \nu} = \frac{\nu}{1 + \nu} \quad (\text{S5})$$

311 The equilibrium mean value of neutral loci, therefore, is independent of the mutation rate, and depends only  
 312 on the ratio between positive and negative mutations. When  $\nu = 0.2$ , for example,  $\mathcal{N}$  converges to a value of  
 313  $\frac{1}{6} \approx 0.167$ , as can be observed in the genotype plots in Fig. 3C.

314 We can go further and calculate the degree to which the average value  $p_k$  of the neutral locus at any gener-

315 ation  $k$  deviates from this equilibrium value  $\mathcal{N}$ :

$$\begin{aligned}
 p_k &= (\varphi_k)_1 = \left( \varphi_0 \cdot \left( \frac{1}{\alpha + \beta} \begin{bmatrix} \alpha & \beta \\ \alpha & \beta \end{bmatrix} + \frac{(1 - \alpha - \beta)^k}{\alpha + \beta} \begin{bmatrix} \beta & -\beta \\ -\alpha & \alpha \end{bmatrix} \right) \right)_1 \\
 &= \left( \frac{1}{\alpha + \beta} \cdot \begin{bmatrix} 1 - p_0 & p_0 \\ \alpha & \beta \end{bmatrix} \cdot \begin{bmatrix} \alpha & \beta \\ \alpha & \beta \end{bmatrix} \right)_1 + \left( \frac{(1 - \alpha - \beta)^k}{\alpha + \beta} \cdot \begin{bmatrix} 1 - p_0 & p_0 \\ -\alpha & \alpha \end{bmatrix} \cdot \begin{bmatrix} \beta & -\beta \\ -\alpha & \alpha \end{bmatrix} \right)_1 \quad (S6) \\
 &= \left( \frac{1}{\alpha + \beta} \cdot \begin{bmatrix} \alpha & \beta \\ \alpha & \beta \end{bmatrix} \right)_1 + \left( \frac{(1 - \alpha - \beta)^k}{\alpha + \beta} \cdot \begin{bmatrix} (1 - p_0)\beta - p_0\alpha & p_0\alpha - (1 - p_0)\beta \end{bmatrix} \right)_1 \\
 &= \frac{\beta}{\alpha + \beta} + \frac{(1 - \alpha - \beta)^k \cdot (p_0\alpha - (1 - p_0)\beta)}{\alpha + \beta}
 \end{aligned}$$

$$\begin{aligned}
 \Rightarrow |p_k - \mathcal{N}| &= \left| \frac{\beta}{\alpha + \beta} + \frac{(1 - \alpha - \beta)^k \cdot (p_0\alpha - (1 - p_0)\beta)}{\alpha + \beta} - \frac{\beta}{\alpha + \beta} \right| \\
 &= \left| \frac{(1 - \alpha - \beta)^k \cdot (p_0\alpha - (1 - p_0)\beta)}{\alpha + \beta} \right| = \frac{1}{\alpha + \beta} |(1 - \alpha - \beta)^k \cdot (p_0\alpha - (1 - p_0)\beta)| \\
 &= \frac{1}{\alpha + \beta} \cdot |1 - \alpha - \beta|^k \cdot |p_0(\alpha + \beta) - \beta| \quad (S7) \\
 &= \frac{1}{\mu + \mu\nu} \cdot |1 - \mu - \mu\nu|^k \cdot |p_0(\mu + \mu\nu) - \mu\nu| \\
 &= \frac{1}{1 + \nu} \cdot |1 - \mu(1 + \nu)|^k \cdot |p_0(1 + \nu) - \nu|
 \end{aligned}$$

316 For any deviation  $\delta$  between  $p_0$  and  $\mathcal{N}$ , therefore, we can calculate the earliest generation  $K$  for which  $|p_k -$   
 317  $\mathcal{N}| < \delta$ :

$$\begin{aligned}
 \frac{1}{1 + \nu} \cdot |1 - \mu(1 + \nu)|^K \cdot |p_0(1 + \nu) - \nu| &< \delta \\
 \Rightarrow |1 - \mu(1 + \nu)|^K &< \delta \frac{1 + \nu}{|p_0(1 + \nu) - \nu|} \\
 \Rightarrow K \cdot \log(|1 - \mu(1 + \nu)|) &< \log \left( \delta \frac{1 + \nu}{|p_0(1 + \nu) - \nu|} \right) \quad (S8) \\
 \Rightarrow K > \log \left( \delta \frac{1 + \nu}{|p_0(1 + \nu) - \nu|} - |1 - \mu(1 + \nu)| \right)
 \end{aligned}$$

318 Unlike the value of  $\mathcal{N}$  itself, therefore, the number of generations required for  $p_k$  to converge to within a given  
 319 distance of  $\mathcal{N}$  does depend on the mutation rate  $\mu$ , with higher values of  $\mu$  resulting in faster convergence  
 320 times.

321 The above calculations provide an alternative method for specifying the number of stages in an AEGIS  
 322 run: rather than explicitly specifying a total number of stages, one can specify the desired value of  $\delta$ , and the  
 323 simulation will run until all individuals in the population are at least  $K$  generations removed from the starting  
 324 population, then stop. In principle, this provides a more reliable method for ensuring that the population  
 325 has evolved to a sufficient state of equilibrium; however, for simplicity, and due to the extra complications  
 326 introduced by the sexual case (which are not covered here), we have restricted ourselves in this publication to  
 327 simulations running for a fixed number of stages.
